# Supplementary material for: Emerging investigator series: in-depth chemical profiling of tire and artificial turf crumb rubber: aging, transformation products, and transport pathways
Source: Royal Society of Chemistry journal article supplement (doi:10.1039/d4em00326h), 2024-01-01
Supplement: d4em00326h2.xlsx [file d4em00326h2.xlsx]

## Sheet: Contents
Supplemental Table Number	Table Captions
S1	Purchasing information for standards used for targeted quantitation
S2	Artifical turf source information
S3	Tire crumb rubber source information
S4	HPLC-HRMS parameters for chemical profiling and suspect screening
S5	HPLC-HRMS parameters for quantitation
S6	MS/MS acquisition table for quantitation
S7	Skyline data processing parameters
S8	Precision, IDL, IQL, MDL results of quantitation
S9	Quantitation linearity and precision for each sample preparation method
S10	Absolute and relative recovery results
S11	Compound discoverer processing parameters
S12	Concentration of targeted compounds in crumb rubber samples for each sample preparation method
S13	Group concentrations of targeted compounds in crumb rubber samples for each sample preparation method
S14	Results of Mann-Kendall time trend analysis
S15	Relative compound concentrations in crumb rubber extractables
S16	Median retention time, median m/z, total peak area and total # features of crumb rubber samples in positive and negative ion mode for each sample preparation method
S17	Detailed results of suspect screening for extractable and leachables
S18	Peak area of suspect screening compounds from positive ion mode extractables
S19	Peak area of suspect screening compounds from positive ion mode leachables

## Sheet: Table S1
Table S1. Purchasing information for standards used for targeted quantitation
Analyte	Abbreviation	LogP*	CAS#	Source	Use
p-phenylenediamine antioxidants (PPDs)
N-(1,3-Dimethylbutyl)-N'-phenyl-p-phenylenediamine	6PPD	5.127	793-24-8	Sigma-Aldrich	Protective additive (anti-aging agent / antiozonant)
N-Isopropyl-N'-phenyl-1,4-phenylenediamine	IPPD	3.755	101-72-4	AmBeed, Inc.	Protective additive (anti-aging agent / antiozonant)
PPD transformation products (PPD TPs)
6PPD-quinone	6PPD-Q	3.857	2754428-18-5	HPC Standards Inc.	Transformation product of 6PPD
Other Rubber Antioxidants (AOs)
2,2,4-trimethyl-1,2,3,4-tetrahydroquinoline		3.94	4497-58-9	AmBeed, Inc.	Protective additive (anti-aging agent / antiozonant)
Dicyclohexylamine		3.582	101-83-7	Sigma-Aldrich	Protective additive (anti-aging agent / antiozonant)
4-phenylazodiphenylamine		5.009	101-75-7	Sigma-Aldrich	Protective additive (anti-aging agent / antiozonant)
N-phenyl-1-naphthylamine		4.54	90-30-2	Acros Organics	Protective additive (anti-aging agent / antiozonant)
Vulcanizing accelerators (VAs)
1,3-diphenylguanidine	DPG	2.384	102-06-7	Alfa Aesar	Vulcanizing additive (vulcanization accelerator)
1,3-di-o-tolylguanidine	DOTG	2.57	97-39-2	Sigma-Aldrich	Vulcanizing additive (vulcanization accelerator)
1,3-diphenylurea		3.015	102-07-8	Sigma-Aldrich	Transformation product of DPG
Hexa(methoxymethyl)melamine	HMMM	3.313	3089-11-0	Combi Blocks Inc.	Cross-linking agent
Triisopropanolamine	TIPA	0.073	122-20-3	Sigma-Aldrich	Cross-linking agent
Benzotriazoles and benzothiazoles (BTHs & BTRs)
Benzothiazole	BTH	1.899	95-16-9	Sigma-Aldrich	Vulcanizing additive (vulcanization accelerator)
2-aminobenzothiazole	2-amino-BTH	1.88	136-95-8	Sigma-Aldrich	Structural unit
2-(Methylthio)benzothiazole	2-Me-S-BTH	2.838	149-30-4	Sigma-Aldrich	Transformation product of MBT
2-mercaptobenzothiazole	MBT	2.59	95-14-7	Sigma-Aldrich	Vulcanizing additive (vulcanization accelerator)
1H-benzotriazole	1H-BTR	1.44	615-22-5	HPC Standards Inc.	Structural unit
Plasticizers
Benzyl butyl phthalate	BBP	4.91	85-68-7	Sigma-Aldrich	Plasticizer
Caprolactam		-0.039	105-60-2	Sigma-Aldrich	Plasticizer
Internal Standards
6PPD-quinone-d5	6PPD-Q-d5			HPC Standards Inc.
Benzothiazole-d4				Toronto Research Chemicals Inc.
1,3-Diphenylguanidine-d10				Toronto Research Chemicals Inc.
Dioctyl phthalate-d4				Sigma-Aldrich
Tris(2-butoxyethyl)phosphate-d27				Toronto Research Chemicals Inc.
*LogP values calculated by XLogP3 3.0 (PubChem)

## Sheet: Table S2
Table S2. Artifical turf source information
Name	Field Type	Date Collected	Date of Install	Notes
14 yr	School Field	2023-09-09	2009
13 yr	School Field	2023-08-24	2010	Old turf that was being removed that day
6 yr	Public Park	2023-09-09	2017
3 yr B	School Field	2021-11-29	Summer 2018	Covered by Temporary Air Structure in winter
3 yr A	School Field	2021-11-29	Summer 2018
2 yr	Public Park	2021-11-29	Summer 2019
1-2 yr	School Field	2023-02-12	Summer 2021
<1 yr	Public Park	2023-02-25	Summer 2022
Unk1	School Field	2023-06-14	?
Unk2	School Field	2023-08-24	?
0 yr	School Field	2023-08-24	2024-08-24	New turf that was being installed that day

## Sheet: Table S3
Table S3. Tire crumb rubber source information
Sample	Source	Tire Composition	Preparation Method
TU&N	Generated by Washington State University	Mixture of 9 used/new tire tread	Physical Abrasion
TU	Purchased online by Washington State University	Mixture of used tire tread	Cryomilled
TN	Provided by U.S. Tire Manufacturers Association	Mixture of new tire tread manufactured between 2020 - 2021	Cryomilled

## Sheet: Table S4
Table S4. HPLC-HRMS parameters for chemical profiling and suspect screening
Thermo Vanquish Flex Liquid Chromatograph
Flow Rate (mL/min)	0.5
Column Chamber Temp. (°C)	45
Post-Column Cooler Temperature (°C)	45
Time (min)	Mobile Phase A	Mobile Phase B
0	95	5
0.5	95	5
3	40	60
18	0	100
21	0	100
21.1	95	5
25.5	95	5
Positive Ion Mode Composition	Water w/ 0.1% Formic Acid	Methanol w/ 0/1% Formic Acid
Negative Ion Mode Composition	Water w/ 0.3 mM Ammonium Fluoride	Methanol w/ 0.3 mM Ammonium Fluoride
Thermo Exploris 240 HESI-q-Orbitrap High-Resolution Mass Spectrometer
	Positive Ion Mode	Negative Ion Mode
Ion Source
Spray Voltage (V)	2500	3000
Sheath Gas (Arb)	45	60
Aux Gas (Arb)	5	15
Sweep Gas (Arb)	0	0
Ion Transfer Tube Temp. (°C)	300	250
Vaporizer Temp. (°C)	300	250
Global Parameters
Infusion Mode	Liquid Chromatography
Expected LC Peak Wdith (s)	10
Advanced Peak Determination	On
Mild Trapping	Off
Default Charge State	1
AcquireX Method Modification	Off
Internal Mass Calibration	EASY-IC
Internal Mass Calibration Mode	Run Start
Full Scan Properties
Orbitrap Resolution	45000
Scan Range (m/z)	100 - 1,500
RF Lens (%)	80
AGC Target	Standard
Maximum Injection Time Mode	Auto
Microscans	1
Data Type	Profile
Source Fragmentation	Off
Dynamic Exclusion Properties
Dynamic Exclusion Mode	Custom
Exclude after n times	3
If occurs within (sec)	10
Exclusion duration (sec)	10
Mass Tolerance	pmm
Low	5
High	10
Exclude Isotopes	On
Perform dependent scan on single charge state per precursor only	Off
Apex Detection Properties
Desired Apex Window (%)	30
Data-Dependent MS/MS Scan Properties
Data Dependent Mode	Cycle Time
Time between Master Scans (sec)	1
Multiplex Ions	Off
Isolation Window (m/z)	0
Isolation Offset	Off
Collision Energy Type	Absolute
HCD Collision Energies (V)	30, 60
Orbitrap Resolution	22500
Scan Range Mode	Auto
AGC Target	Standard
Maximum Injection Time Mode	Auto
Microscans	1
Data Type	Centroid

## Sheet: Table S5
Table S5. HPLC-HRMS parameters for quantitation
Thermo Vanquish Flex Liquid Chromatograph
Flow Rate (mL/min)	0.4
Column Chamber Temp. (°C)	45
Post-Column Cooler Temperature (°C)	45
Time (min)	Mobile Phase A	Mobile Phase B
0	95	5
0.25	95	5
0.26	80	20
5	0	100
7	0	100
7.1	95	5
17	95	5
Mobile Phase	Water w/ 0.1% Formic Acid	Methanol w/ 0/1% Formic Acid
Thermo Exploris 240 HESI-q-Orbitrap High-Resolution Mass Spectrometer
	Positive Ion Mode
Ion Source
Spray Voltage (V)	2500
Sheath Gas (Arb)	45
Aux Gas (Arb)	5
Sweep Gas (Arb)	0
Ion Transfer Tube Temp. (°C)	300
Vaporizer Temp. (°C)	300
Global Parameters
Infusion Mode	Liquid Chromatography
Expected LC Peak Wdith (s)	6
Advanced Peak Determination	On
Mild Trapping	Off
Default Charge State	1
AcquireX Method Modification	Off
Internal Mass Calibration	EASY-IC
Internal Mass Calibration Mode	Run Start
Production Ion Scan
Multiplex ion	Off
isolation window (m/z)	0.7
Isolation offset	Off
Collision Energy Type	Absolute
Orbitrap Resolution	60000
Scan Range Mode	Auto
AGC Target	Custom
Normalized AGC Target (%)	200
Maximum injection time mode	Custom
Maximum injection time (ms)	100
Microscans	1
Data Type	Profile
Source Fragmentation	Off
Time mode	Retention time window

## Sheet: Table S6
Table S6. MS/MS acquisition table for quantitation
Analyte	Formula	Adduct	Precursor (m/z)	Precursor Charge (z)	RT Time (min)	Window (min)	Collision Energies (V)	RF Lens (%)	Polarity
N-(1,3-Dimethylbutyl)-N'-phenyl-p-phenylenediamine	C18H24N2	[M+H]+	269.201	1	4.36	0.4	14,40	80	Positive
N-Isopropyl-N'-phenyl-1,4-phenylenediamine	C15H18N2	[M+H]+	227.154	1	3.52	0.4	14,40	80	Positive
6PPD-quinone	C18H22N2O2	[M+H]+	299.175	1	5.52	0.4	25	80	Positive
2,2,4-trimethyl-1,2,3,4-tetrahydroquinoline	C12 H17 N	[M+H]+	176.143	1	3.59	0.4	15	75	Positive
Dicyclohexylamine	C12 H23 N	[M+H]+	182.19	1	3.2	0.4	20	80	Positive
4-phenylazodiphenylamine	C18H15N3	[M+H]+	274.134	1	6.06	0.4	22	80	Positive
N-phenyl-1-naphthylamine	C16 H13 N	[M+H]+	220.112	1	5.71	0.4	20	90	Positive
1,3-diphenylguanidine	C13H13N3	[M+H]+	212.118	1	2.77	0.4	17	80	Positive
1,3-di-o-tolylguanidine	C15H17N3	[M+H]+	240.149	1	3.15	0.4	20	90	Positive
1,3-diphenylurea	C13 H12 N2 O	[M+H]+	213.102	1	4.55	0.4	17	85	Positive
Benzothiazole	C7H5NS	[M+H]+	136.022	1	3.99	0.4	20	80	Positive
2-aminobenzothiazole	C7H6N2S	[M+H]+	151.032	1	2.43	0.4	25	100	Positive
2-(Methylthio)benzothiazole	C8 H7 N S2	[M+H]+	182.009	1	5.08	0.4	20	80	Positive
2-mercaptobenzothiazole	C7 H5 N S2	[M+H]+	167.994	1	4.08	0.4	15	70	Positive
1H-benzotriazole	C6H5N3	[M+H]+	120.056	1	2.98	0.4	20	130	Positive
Benzyl butyl phthalate	C19 H20 O4	[M+H]+	313.143	1	5.82	0.4	20	60	Positive
Caprolactam	C6 H11 N O	[M+H]+	114.091	1	2.58	0.4	20	85	Positive
Hexa(methoxymethyl)melamine	C15H30N6O6	[M+H]+	391.23	1	4.53	0.4	10	60	Positive
Triisopropanolamine	C9 H21 N O3	[M+H]+	192.159	1	0.62	0.4	15	80	Positive
6PPD-quinone-d5	C18H17D5N2O2	[M+H]+	304.207	1	5.59	0.4	25	80	Positive
Benzothiazole-d4	C7HD4NS	[M+H]+	140.047	1	3.99	0.4	20	80	Positive
1,3-Diphenylguanidine-d10		[M+H]+	222.181	1	2.75	0.4	17	85	Positive
dioctyl phthalate-d4	C24D4H34O4	[M+H]+	395.309	1	7.26	0.4	25	80	Positive
Tris(2-butoxyethyl)phosphate-d27	C18D27H12O7P	[M+H]+	426.42	1	5.9	0.4	20	80	Positive

## Sheet: Table S7
Table S7. Skyline data processing parameters
Skyline Parameters
Molecule Settings
Prediction Tab
Retention time predictor	None
Use measured retention times when present	Yes
Time window (min)	1
Library Tab
Library	2024_02_16_Quant_Leachables
Pick Molecules Matching	Library
Rank Molecules by	TFRatio
Labels Tab
None selected
Quantification Tab
Regression fit	Linear
normalization method	Ratio to Heavy
simple precursor ratios	No
regression weighting	None
MS level	All
Units	ng/mL
Max LOQ bias (%)	20
Calculate LOD by	None
Max LOQ CV (%)	20
Qualitative ion ratio threshold (%)	-
Transition Settings
Prediction Tab
Precursor mass	Monoisotopic
Product ion mass	Monoisotopic
Collision energy	None
Deculstering potential	None
Optimization library	None
Compensation voltage	None
Use optimization values when present	No
Filter Tab
Precursor adducts	[M+H]
Fragment adducts	[M+]
Ion types	f, p
Precusor m/z exclusion window	-
Auto-select all matching transitions	No
Library Tab
Ion match tolerance (ppm)	5
If a library spectrum is available, pick its most intense ions	Yes
Pick:
# product ions	6
# minimum product ions	2
Instrument Tab
Min m/z	50
Dynamic min product m/z	No
Max m/z	1500
Method match tolerance (m/z)	0.005
Firmware transition limit	-
Firmware inclusion limit	-
Min time (min)	-
Max Time (min)	-
Triggered Chromatographic Acquisition	Yes
Instrument Tab
MS1 Filtering
Isotope peaks included	No
MS/MS Filtering
Acquisition method	PRM
Product mass analyzer	Orbitrap
Resolving power	30,000 @ m/z 200
Use high-selectivity extraction	No
Retention time filtering	Include all matching scans
Ion mobility library
Ion mobility library	None

## Sheet: Table S8
Table S8. Precision, IDL, IQL, MDL results of quantitation
Target Analyte	Precision (%)		IDL (ng/mL)	IQL (ng/mL)	MDL (µg/g)				Conc. Used for IDL/IQL (ng/mL)	ISTD
	Inter-day (n=9)				Extractables	Leachables	Gastric	Gastrointestinal
	Conc. Level 1 (1 or 10)	Conc. Level 2 (10 or 100)
6PPD	0.353469	0.0351422	1.1	3.5	0.0042	0.013	0.00084	0.002	1	6PPD-quinone-d5
IPPD	0.116924	0.0314941	0.35	1.2	0.0028	0.0053	0.0003	0.0027	1	6PPD-quinone-d5
6PPD-Q	0.0332983	0.0340067	0.1	0.33	0.081	0.0026	0.00019	0.00027	1	6PPD-quinone-d5
2,2,4-Trimethyl-1,2,3,4-tetrahydroquinoline	0.0720124	0.315663	0.22	0.72	0.0004	0.001	0.00041	0.0009	1	Benzothiazole-d4
Dicyclohexylamine	0.0760657	0.065767	0.23	0.76	0.028	0.013	0.0069	0.0025	1	1,3-Diphenylguanidine-d10
4-phenylazodiphenylamine	0.0747558	0.0961236	0.22	0.75	0.019	0.023	0.00019	7.9e-06	1	6PPD-quinone-d5
N-phenyl-1-naphthylamine	0.187076	0.233461	0.56	1.9	0.012	0.058	0.0028	0.0022	1	dioctyl phthalate-d4
DPG	0.135	0.0593562	0.4	1.3	0.0057	0.0062	0.0033	0.0039	1	1,3-Diphenylguanidine-d10
DOTG	0.137132	0.0491459	0.41	1.4	0.0015	0.002	0.00066	0.001	1	1,3-Diphenylguanidine-d10
1,3-diphenylurea	0.183759	0.0323744	0.55	1.8	0.012	0.033	0.0031	0.0011	1	6-PPDQ-d5
BTH	0.161606	0.159873	0.48	1.6	0.33	0.65	0.063	0.042	1	Benzothiazole-d4
2-amino-BTH	0.156761	0.0609387	0.47	1.6	0.012	0.013	0.0011	0.0013	1	Benzothiazole-d4	*used 100 ng/mL for level 2
2-Me-S-BTH	0.38077	0.042595	1.1	3.8	0.094	0.069	0.0021	0.0054	1	6-PPDQ-d5
MBT	0.19982	0.76183	0.6	2	0.025	0.021	0.003	0.027	1	Benzothiazole-d4
1H-BTR	0.261277	0.0861843	0.78	2.6	0.021	0.1	0.0012	0.11	1	Benzothiazole-d4
BBP	0.0386121	0.0324161	0.12	0.39	0.32	1.8	0.22	0.058	1	dioctyl phthalate-d4	*used 10, 100 ng/mL
Caprolactam	0.0718812	0.113973	2.3	7.8	0.11	1.4	0.027	0.031	1	1,3-Diphenylguanidine-d10
HMMM	0.125956	0.0656307	0.38	1.3	0.077	0.0093	0.0024	0.022	1	6PPD-quinone-d5
TIPA	0.112876	0.0429023	0.34	1.1	0.0094	0.0089	0.0012	0.00085	1	1,3-Diphenylguanidine-d10

## Sheet: Table S9
Table S9. Quantitation linearity and precision for each sample preparation method
	Leachables				Gastric				Gastrointestinal				Extractables
Target Analyte	Linearity		Precision (%)		Linearity		Precision (%)		Linearity		Precision (%)		Linearity		Precision (%)
	Working range (ng/mL)	R^2	Intra-day (n=3)		Working range (ng/mL)	R^2	Intra-day (n=3)		Working range (ng/mL)	R^2	Intra-day (n=3)		Working range (ng/mL)	R^2	Intra-day (n=3)
			Conc. Level 1 (1 or 10)	Conc. Level 2 (10 or 100)			Conc. Level 1 (1 or 10)	Conc. Level 2 (10 or 100)			Conc. Level 1 (1 or 10)	Conc. Level 2 (10 or 100)			Conc. Level 1 (1 or 10)	Conc. Level 2 (10 or 100)
6PPD	1-100	0.9968	0.031	0.014755	25-500	0.9843	5.8%*	0.29%*	5-500	0.9867	120%*	21%*	1-100	0.9943	0.130117	0.00768279
IPPD	10-250	0.993	0.073	0.0358278	5-100	0.9941	3.0%*	0.34%*	10-500	0.9956	0.0115851	0.0191153	5-100	0.9945	0.0584375	0.0181458
6PPD-Q	0.5-500	0.9994	0.029	0.0163062	0.5-500	0.993	0.0349243	0.0334789	1-250	0.9997	0.0443066	0.0110211	0.5-250	0.9994	0.0246558	0.0331438
2,2,4-Trimethyl-1,2,3,4-tetrahydroquinoline	0.5-500	0.9976	0.056	0.42644	0.5-250	0.996	0.0621994	0.212137	0.1-100	0.9993	0.0234923	0.0245871	0.5-100	0.9996	0.0301164	0.0671437
Dicyclohexylamine	5-500	0.9995	0.0036	0.028743	5-500	0.9983	0.0778717	0.0147633	5-500	0.9995	0.0419003	0.0227332	5-500	0.9971	0.0484011	0.0412782
4-phenylazodiphenylamine	0.5-500	0.9978	0.03	0.0521551	0.5-250	0.9971	0.0299093	0.0475698	0.1-100	0.9976	0.00459068	0.0224801	1-250	0.9999	0.0192227	0.0385771
N-phenyl-1-naphthylamine	0.5-250	0.9957	0.048	0.0658745	1-500	0.9975	0.0102343	0.156737	0.5-250	0.9985	0.00706191	0.00763262	1-500	0.9967	0.0602376	0.0755473
DPG	0.1-250	0.999	0.016	0.0305081	5-500	0.9897	6.6%*	0.44%*	5-500	0.9933	21%*	10%*	5-500	0.9931	0.109679	0.0566097
DOTG	0.5-500	0.9991	0.015	0.0209664	0.5-500	0.9992	2.1%*	0.32%*	1-250	0.9986	0.00456462	0.00468254	1-500	0.9969	0.128312	0.0431759
1,3-diphenylurea	0.5-250	0.9972	0.03	0.0176332	1-250	0.9976	6.1%*	3.2%*	1-500	0.99798	0.025475	0.0384434	1-500	0.9932	0.12464	0.0109843
BTH	10-500	0.9968	0.13	0.10769	10-500	0.998	0.0898926	0.0816789	5-500	0.9807	0.112395	0.108903	10-500	0.9981	0.0602475	0.0472558
2-amino-BTH	1-500	0.9965	0.059	0.00484364	5-500	0.9967	3.8%*	2.3%*	1-250	0.9871	0.0279129	0.015676	0.5-250	0.9992	0.0984025	0.0529089
2-Me-S-BTH	0.5-500	0.9989	0.052	0.00957655	1-500	0.9983	0.0523362	0.0206107	5-500	0.9856	0.0358305	0.0290383	0.5-250	0.9993	0.0177481	0.022983
MBT	0.5-500	0.9935	0.19	0.455814	5-500	0.997	0.103485	0.423536	5-250	0.9845	13%*	2.9%*	1-250	0.991	0.0585019	0.523454
1H-BTR	0.1-100	0.9965	0.11	0.0424814	1-250	0.9956	4.7%*	2.3%*	0.5-250	0.9875	0.0186399	0.00479985	5-500	0.9957	0.303754	0.0770652
BBP	5-500	0.9927	0.06	0.0324775	1-500	0.9934	0.023068	0.0366865	5-500	0.9835	0.021233	0.0266146	1-250	0.9982	0.0291336	0.00948076
Caprolactam	5-250	0.9809	8%*	21%*	1-500	0.993	8.1%*	6.1%*	1-500	0.9978	5.7%*	1.6%*	5-250	0.9889	4.8%*	2.2%*
HMMM	1-500	0.9966	0.0323627	0.00771514	5-500	0.998	3.5%*	1.3%*	1-250	0.9943	0.0968956	0.057273	1-250	0.9947	0.108168	0.082346
TIPA	0.5-500	0.9983	0.0392064	0.00913846	1-500	0.9994	0.066461	0.0338551	0.5-500	0.9987	0.0105082	0.0134794	5-500	0.9962	0.146959	0.0491526
*10, 100 for Precision

[truncated: 10 more sheets: Table S10, Table S11, Table S12, Table S13, Table S14, Table S15, Table S16, Table S17, Table S18, Table S19]
